# Supplementary material for: Geographical controls and anthropogenic impacts on dissolved organic carbon from mountainous rivers: Insights from optical properties and carbon isotopes
Source: Copernicus journal article supplement (doi:10.5194/bg-2022-217), 2022-11-23
Supplement: Supplementary file 1 [file bg-2022-217-supplement.pdf]

*Supplement of*

## **Geographical controls and anthropogenic impacts on dissolved organic carbon from mountainous rivers: Insights from optical properties and carbon isotopes**

Shuai Chen<sup>1</sup>, Jun Zhong<sup>2</sup>, Lishan Ran<sup>1</sup>, Yuanbi Yi<sup>2</sup>, Wanfa Wang<sup>3</sup>, Zelong Yan<sup>4</sup>, Siliang Li<sup>2,5</sup>, Khan M.G. Mostofa<sup>2</sup>

<sup>1</sup>Department of Geography, The University of Hong Kong, Pokfulam Road, Hong Kong, China

<sup>2</sup>Institute of Surface-Earth System Science, School of Earth System Science, Tianjin University, Tianjin, 300072, China

<sup>3</sup>College of Resources and Environmental Engineering, Key Laboratory of Karst Georesources and Environment, Ministry of Education, Guizhou University, Guiyang 550025, China

<sup>4</sup>School of Environmental Science and Technology, Dalian University of Technology, Dalian, 116081, China

<sup>5</sup>State Key Laboratory of Hydraulic Engineering Simulation and Safety, Tianjin University, Tianjin 300072, China

*Correspondence to:* Jun Zhong ([jun.zhong@tju.edu.cn](mailto:jun.zhong@tju.edu.cn)) and Lishan Ran ([lsran@hku.hk](mailto:lsran@hku.hk))

## Contents of file

Figure S1–S3

### Introduction

- 5 This document contains: Figure S1, Relationship between mean drainage slope, mean drainage elevation, and annual air temperature in the Yinjiang (Y), Shiqian (S), and Yuqing (Q) catchments; Figure S2, Land use pattern impacts on DOM character. (a)  $SUVA_{254}$  (in  $L\ mg^{-1}\ m^{-1}$ ) and (b) freshness index ( $\beta/\alpha$ ) decreased with increasing proportion of urban and agricultural land use area in the studied catchments. Outlier (site S3) was excluded from analyses in panel a as the sample was strongly influenced by the road construction, which was evidenced by high POC and TSM concentration (Chen et al., 2021). (c) Humification index (HIX) positively related to the increasing proportion of urban and agricultural land use area.
- 10 Figure S3, Relationship between freshness index ( $\beta/\alpha$ ) and EEM-PARAFAC components (C2) in the Yinjiang (Y), Shiqian (S), and Yuqing (Q) catchments. Components are presented as % of the total components.

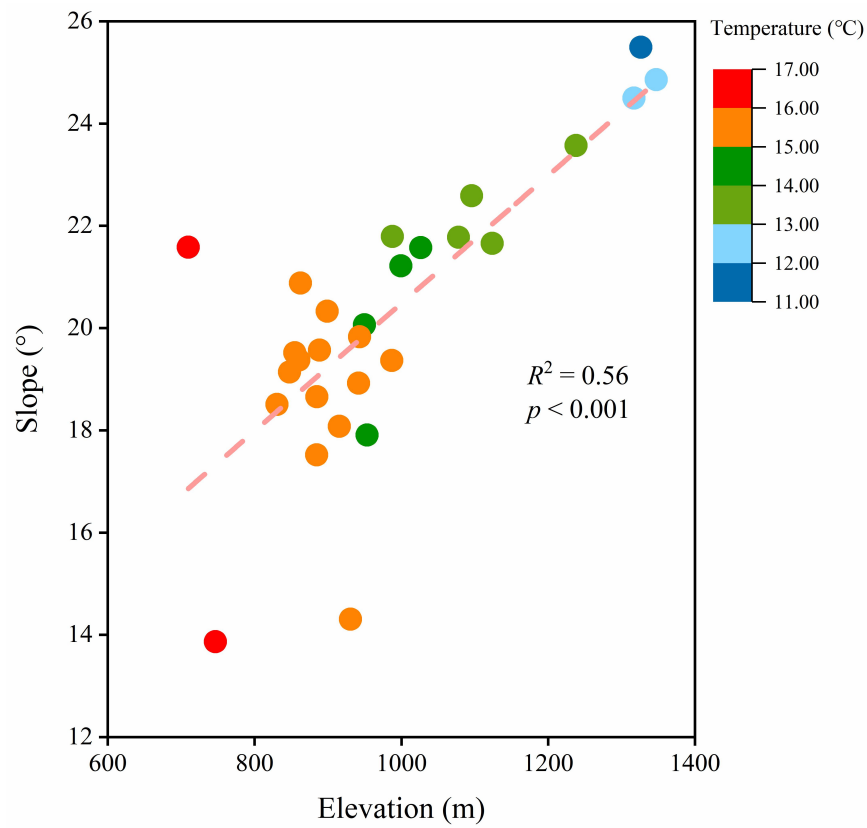

**Figure S1** Relationship between mean drainage slope, mean drainage elevation, and annual air temperature in the Yinjiang (Y), Shiqian (S), and Yuqing (Q) catchments.

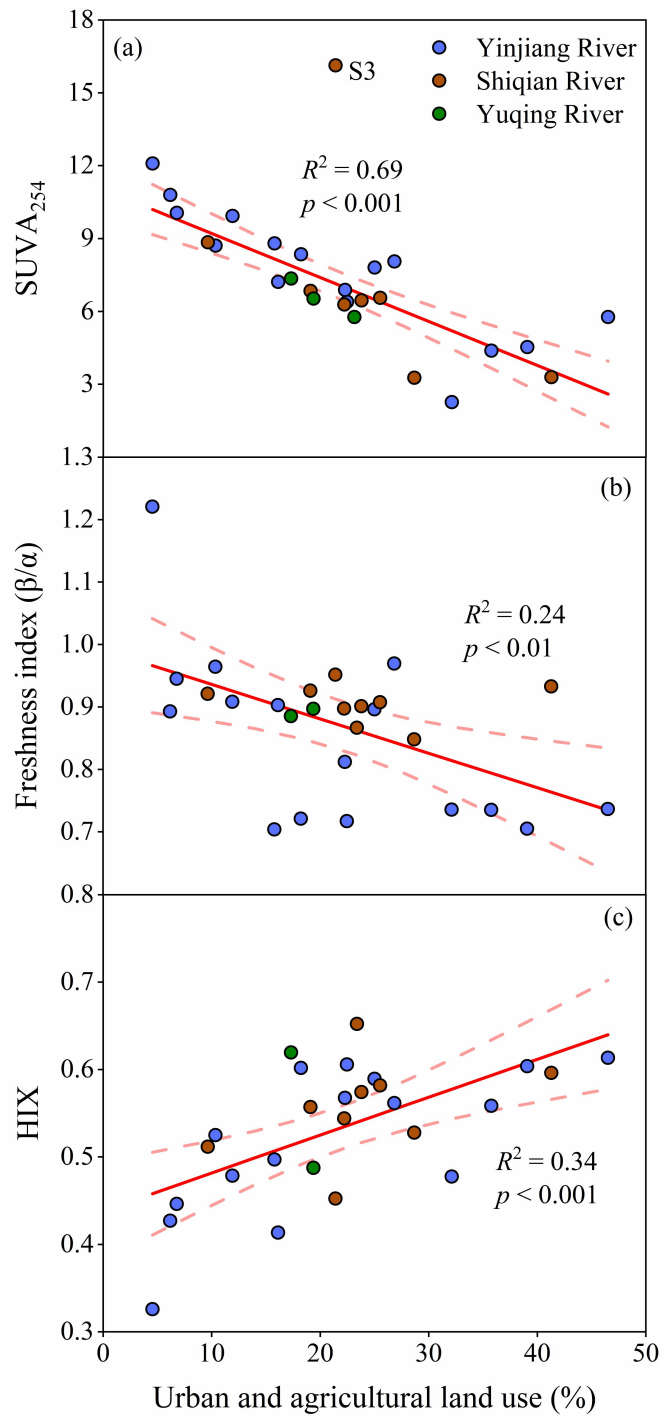

**Figure S2** Land use pattern impacts on DOM character. (a) SUVA<sub>254</sub> (in L mg<sup>-1</sup> m<sup>-1</sup>) and (b) freshness index ( $\beta/\alpha$ ) decreased with increasing proportion of urban and agricultural land use area in the studied catchments. Outlier (site S3) was excluded from analyses in panel a as the sample was strongly influenced by the road construction, which was evidenced by high POC and TSM concentration (Chen et al., 2021). (c) Humification index (HIX) positively related to the increasing proportion of urban and agricultural land use area.



Chen S., Zhong, J., Li, S., Ran, L., Wang, W., Xu, S., Yan, Z. and Xu, S.: Multiple controls on carbon dynamics in mixed karst and non-karst mountainous rivers, Southwest China, revealed by carbon isotopes ( $\delta^{13}\text{C}$  and  $\delta^{14}\text{C}$ ), *Sci. Total Environ.*, 791, 148347, doi:10.1016/j.scitotenv.2021.148347, 2021.
